# Supplementary material for: Transcontinental dispersal of Anopheles gambiae occurred from West African origin via serial founder events
Source: PubMed Central journal article supplement (PMC6923408; doi:10.1038/s42003-019-0717-7), 2019-12-19
Supplement: 42003_2019_717_MOESM1_ESM.pdf [file 42003_2019_717_MOESM1_ESM.pdf]

## Supplementary Information

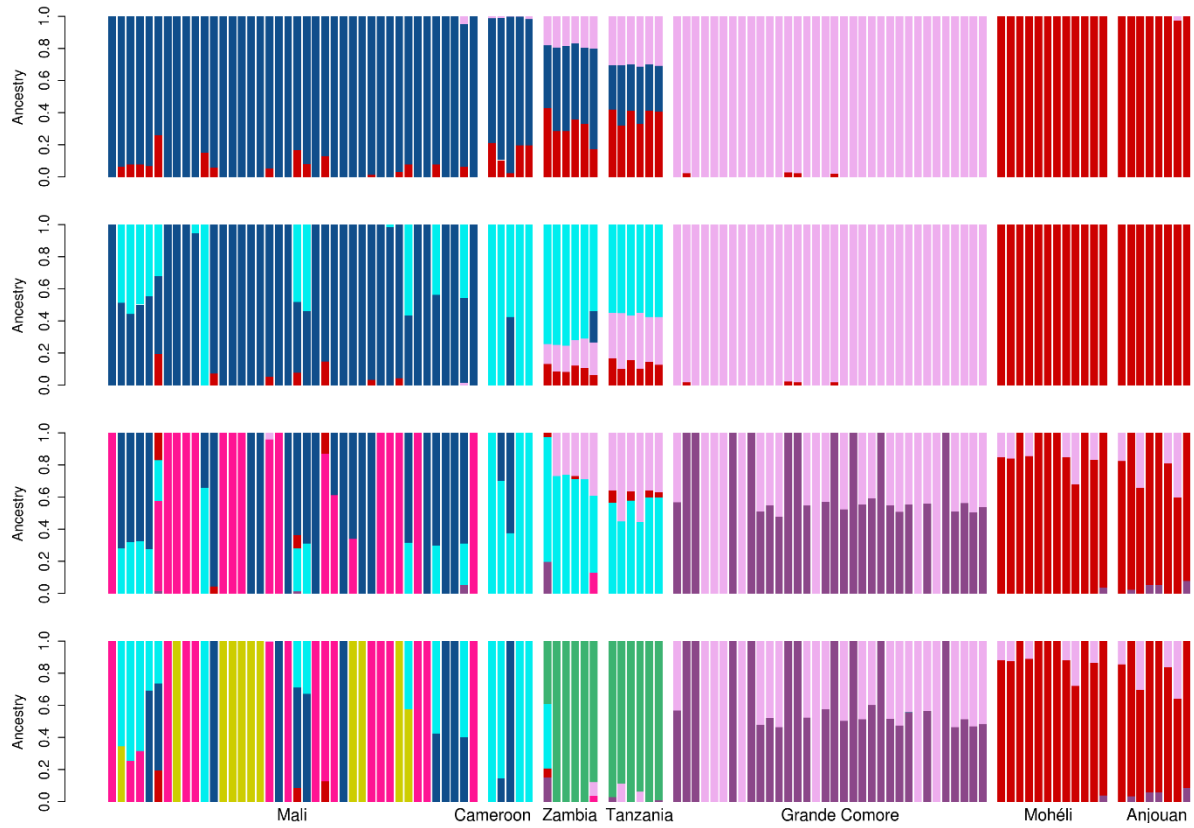

**Supplementary Figure 1 – ADMIXTURE analysis**

Shown are the results for K=3, K=4, K=6 and K=8 (from top to bottom).

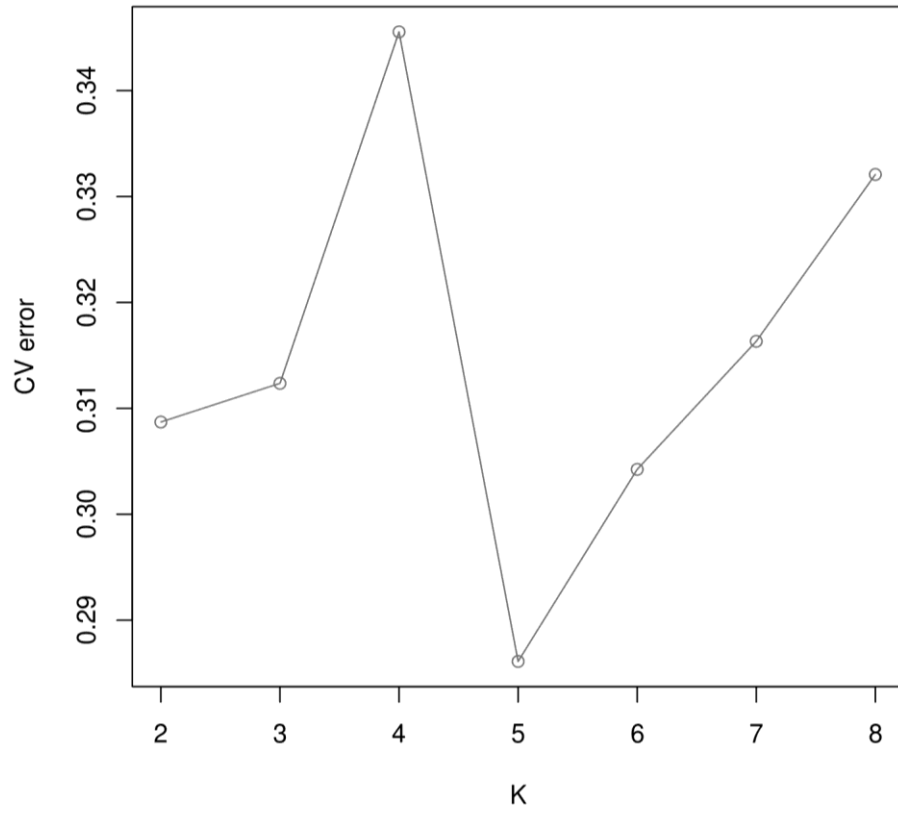

**Supplementary Figure 2 – CV error estimates for ADMIXTURE analyses with different K's**

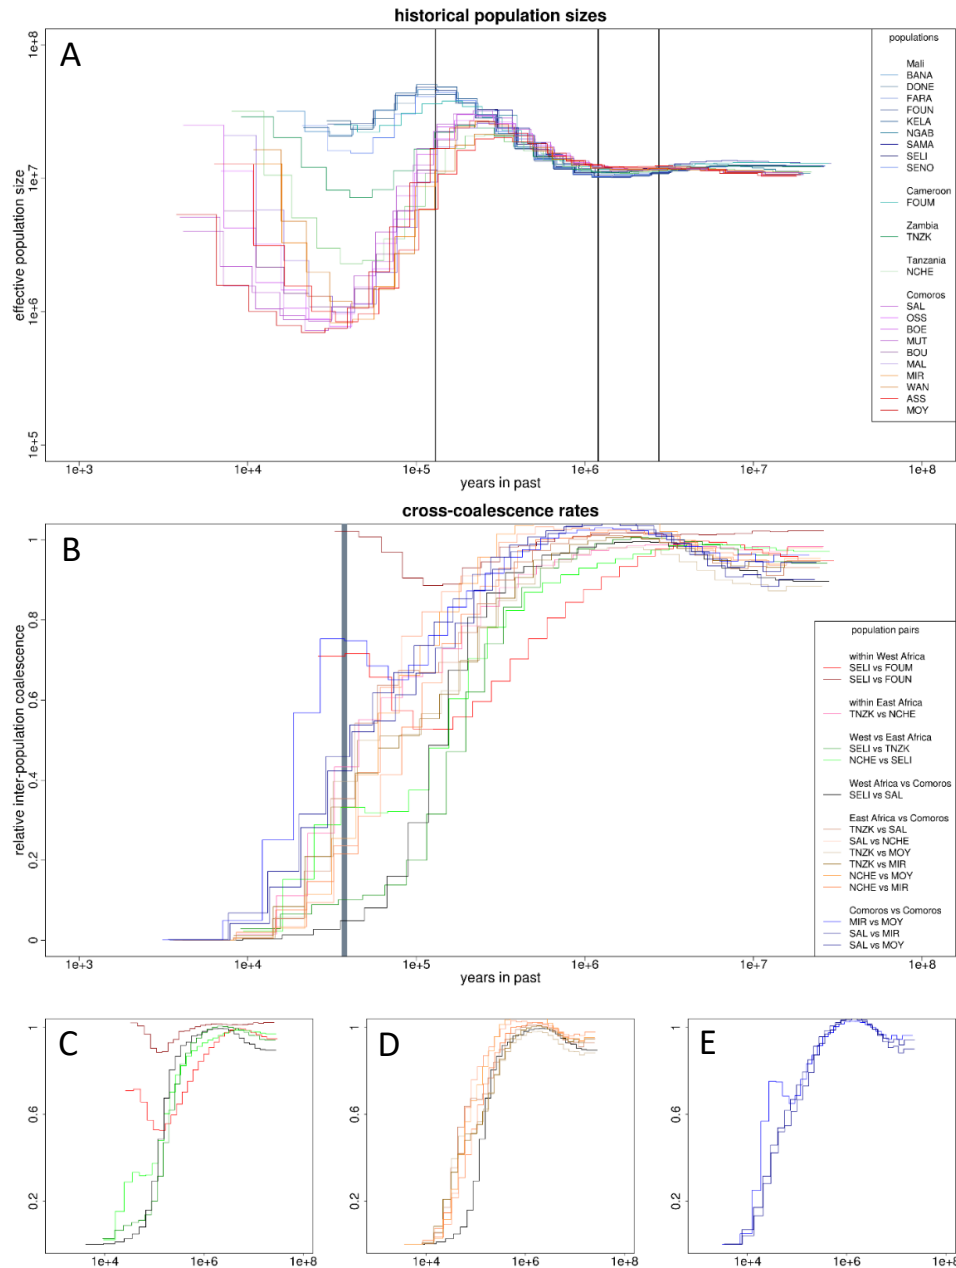

### Supplementary Figure 3 – MSMC2 results

(A) Historical effective population sizes per site. The vertical lines depict the geological appearance of the three islands of the Comoros sampled. (B-E) Cross-coalescence rates of inter-population comparisons. (B) The vertical bar marks the time point most closely to present where estimates for all comparisons are available. (C) Subset of B with only population comparisons of Mali vs other sites. (D) Subset of B with only Comoro vs mainland populations. (E) Subset of B with only inter-Comoro comparisons. Color schemes in C-E are the same as in B. Note the logarithmic scales in plots (all but y-axes in B-E).

### Supplementary Table 1 - Statistics per sample

Samples can be found in NCBI GenBank under BioProject ID PRJNA590708.

| sample       | NCBI accession number | # raw reads | % mapped reads | Medium insert size | coverage |
|--------------|-----------------------|-------------|----------------|--------------------|----------|
| 06SAMA0103   | SAMN13337315          | 22,045,130  | 97.78%         | 429                | 8.0      |
| 06SAMA0130   | SAMN13337316          | 23,756,245  | 98.07%         | 427                | 8.6      |
| 06FOUN0009   | SAMN13337317          | 42,565,747  | 94.19%         | 407                | 14.8     |
| 06FOUN0010   | SAMN13337318          | 56,097,824  | 90.67%         | 368                | 18.8     |
| 06FOUN0026   | SAMN13337319          | 25,316,623  | 90.22%         | 405                | 8.5      |
| 06FOUN0028   | SAMN13337320          | 20,774,239  | 93.10%         | 400                | 7.2      |
| 06DONE0022   | SAMN13337321          | 22,844,443  | 95.41%         | 401                | 8.1      |
| 06DONE0044   | SAMN13337322          | 52,238,457  | 89.33%         | 393                | 17.3     |
| 06DONE0045   | SAMN13337323          | 50,681,550  | 92.93%         | 380                | 17.4     |
| 06DONE0046   | SAMN13337324          | 23,051,498  | 85.91%         | 404                | 7.3      |
| 06DONE0104   | SAMN13337325          | 42,555,805  | 93.45%         | 421                | 14.7     |
| 06DONE0132   | SAMN13337326          | 20,050,934  | 95.48%         | 422                | 7.1      |
| 06BANA0008   | SAMN13337327          | 39,531,310  | 90.14%         | 400                | 13.2     |
| 06BANA0010   | SAMN13337328          | 30,501,977  | 93.57%         | 333                | 10.6     |
| 06BANA0012   | SAMN13337329          | 29,949,432  | 89.43%         | 389                | 9.9      |
| 06BANA0013   | SAMN13337330          | 50,438,159  | 94.72%         | 351                | 17.7     |
| 06BANA0016   | SAMN13337331          | 22,003,804  | 92.56%         | 424                | 7.5      |
| 06BANA0035   | SAMN13337332          | 20,886,896  | 95.82%         | 364                | 7.4      |
| 2006NGAB901E | SAMN13337333          | 54,121,189  | 98.64%         | 389                | 19.8     |
| 06SENO0003   | SAMN13337334          | 22,767,308  | 91.54%         | 421                | 7.7      |
| 06SENO0009   | SAMN13337335          | 20,707,512  | 98.46%         | 401                | 7.6      |
| 06SENO0021   | SAMN13337336          | 19,005,670  | 98.17%         | 420                | 6.9      |
| 06SENO0024   | SAMN13337337          | 49,386,568  | 98.05%         | 413                | 17.9     |
| 06SENO0031   | SAMN13337338          | 22,797,847  | 87.57%         | 412                | 7.4      |
| 06SENO0035   | SAMN13337339          | 21,437,580  | 89.65%         | 427                | 7.1      |
| 06FARA0003   | SAMN13337340          | 30,276,335  | 91.94%         | 400                | 10.3     |
| 06FARA0004   | SAMN13337341          | 49,210,477  | 91.05%         | 399                | 16.6     |
| 06FARA0007   | SAMN13337342          | 23,441,093  | 94.48%         | 415                | 8.2      |
| 06FARA0008   | SAMN13337343          | 27,015,461  | 97.67%         | 399                | 9.8      |
| 06FARA0009   | SAMN13337344          | 22,953,867  | 98.10%         | 417                | 8.3      |
| 06KELA0003   | SAMN13337345          | 22,044,504  | 98.75%         | 405                | 8.1      |
| 06KELA0016   | SAMN13337346          | 52,310,238  | 98.44%         | 411                | 19.1     |
| 06KELA0066   | SAMN13337347          | 20,346,700  | 97.97%         | 405                | 7.4      |
| 06KELA0084   | SAMN13337348          | 19,868,669  | 98.51%         | 405                | 7.2      |
| 06KELA0106   | SAMN13337349          | 17,095,249  | 98.63%         | 421                | 6.2      |
| 06SELI0102   | SAMN13337350          | 20,456,085  | 96.27%         | 441                | 7.3      |
| 06SELI0106   | SAMN13337351          | 58,579,044  | 92.80%         | 305                | 20.1     |
| 06SELI0114   | SAMN13337352          | 23,034,202  | 93.58%         | 399                | 8.0      |
| 06SELI0117   | SAMN13337353          | 20,726,953  | 96.36%         | 429                | 7.4      |
| 06SELI0123   | SAMN13337354          | 64,363,548  | 96.87%         | 403                | 23.1     |
| 06FOUM0032   | SAMN13337355          | 22,249,164  | 95.54%         | 419                | 7.9      |
| 06FOUM0033   | SAMN13337356          | 22,534,380  | 90.74%         | 420                | 7.6      |

| sample      | NCBI accession number | # raw reads | % mapped reads | Medium insert size | coverage |
|-------------|-----------------------|-------------|----------------|--------------------|----------|
| 06FOUM0035  | SAMN13337357          | 91,730,833  | 96.17%         | 361                | 32.7     |
| 06FOUM0036  | SAMN13337358          | 32,191,373  | 98.32%         | 417                | 11.7     |
| 06FOUM0037  | SAMN13337359          | 20,476,425  | 94.46%         | 392                | 7.2      |
| 2012TNZK004 | SAMN13337360          | 30,482,811  | 97.91%         | 350                | 11.1     |
| 2012TNZK039 | SAMN13337361          | 58,800,000  | 98.59%         | 324                | 21.5     |
| 2012TNZK042 | SAMN13337362          | 26,662,011  | 98.27%         | 347                | 9.7      |
| 2012TNZK044 | SAMN13337363          | 34,466,136  | 97.05%         | 367                | 12.4     |
| 2012TNZK048 | SAMN13337364          | 31,895,511  | 98.37%         | 321                | 11.6     |
| 2012TNZK057 | SAMN13337365          | 28,687,884  | 98.01%         | 327                | 10.4     |
| 2015NCHE001 | SAMN13337366          | 26,854,122  | 96.29%         | 404                | 9.6      |
| 2015NCHE002 | SAMN13337367          | 23,339,226  | 98.59%         | 438                | 8.5      |
| 2015NCHE003 | SAMN13337368          | 28,837,835  | 86.61%         | 366                | 9.3      |
| 2015NCHE004 | SAMN13337369          | 31,765,127  | 90.28%         | 380                | 10.6     |
| 2015NCHE005 | SAMN13337370          | 44,781,499  | 98.51%         | 364                | 16.3     |
| 2015NCHE006 | SAMN13337371          | 27,283,888  | 97.63%         | 412                | 9.9      |
| 2011BOU003  | SAMN13337372          | 27,677,011  | 96.89%         | 386                | 9.9      |
| 2011BOU015  | SAMN13337373          | 24,672,148  | 98.09%         | 390                | 9.0      |
| 2011BOU019  | SAMN13337374          | 23,117,304  | 96.83%         | 403                | 8.3      |
| 2011BOU029  | SAMN13337375          | 20,383,883  | 98.54%         | 400                | 7.4      |
| 2011BOU030  | SAMN13337376          | 23,814,955  | 97.62%         | 393                | 8.6      |
| 2011BOU042  | SAMN13337377          | 50,555,233  | 96.45%         | 398                | 18.1     |
| 2011BOE005  | SAMN13337378          | 23,597,208  | 97.66%         | 400                | 8.5      |
| 2011BOE007  | SAMN13337379          | 23,948,978  | 98.24%         | 407                | 8.7      |
| 2011BOE020  | SAMN13337380          | 23,726,039  | 98.43%         | 410                | 8.6      |
| 2011BOE035  | SAMN13337381          | 60,884,880  | 97.67%         | 260                | 22.0     |
| 2011BOE036  | SAMN13337382          | 25,832,367  | 97.82%         | 250                | 9.4      |
| 2011BOE048  | SAMN13337383          | 29,477,875  | 97.55%         | 395                | 10.7     |
| 2011OSS001  | SAMN13337384          | 18,415,486  | 98.69%         | 418                | 6.7      |
| 2011OSS012  | SAMN13337385          | 22,492,203  | 98.67%         | 408                | 8.2      |
| 2011OSS013  | SAMN13337386          | 20,531,472  | 97.82%         | 421                | 7.4      |
| 2011OSS017  | SAMN13337387          | 20,844,334  | 98.32%         | 415                | 7.6      |
| 2011OSS018  | SAMN13337388          | 49,813,232  | 98.66%         | 395                | 18.2     |
| 2011OSS027  | SAMN13337389          | 23,657,169  | 98.51%         | 411                | 8.6      |
| 2011MUT002  | SAMN13337390          | 24,123,640  | 98.78%         | 375                | 8.8      |
| 2011MUT038  | SAMN13337391          | 26,549,241  | 91.82%         | 418                | 9.0      |
| 2011MUT039  | SAMN13337392          | 61,654,286  | 90.30%         | 349                | 20.6     |
| 2011MUT041  | SAMN13337393          | 42,833,005  | 96.08%         | 415                | 15.2     |
| 2011MUT045  | SAMN13337394          | 22,795,876  | 95.25%         | 430                | 8.0      |
| 2011MUT046  | SAMN13337395          | 21,616,511  | 93.74%         | 421                | 7.5      |
| 2011SAL001  | SAMN13337396          | 20,818,098  | 98.51%         | 432                | 7.6      |
| 2011SAL003  | SAMN13337397          | 23,421,787  | 97.97%         | 440                | 8.5      |
| 2011SAL005  | SAMN13337398          | 59,656,534  | 98.28%         | 400                | 21.7     |
| 2011SAL008  | SAMN13337399          | 19,583,349  | 98.80%         | 413                | 7.2      |
| 2011MAL006  | SAMN13337400          | 45,050,379  | 97.90%         | 296                | 16.3     |
| 2011MAL017  | SAMN13337401          | 69,276,716  | 98.74%         | 297                | 25.3     |
| 2011MAL020  | SAMN13337402          | 26,061,794  | 98.12%         | 314                | 9.5      |
| 2011MAL028  | SAMN13337403          | 22,911,609  | 98.37%         | 355                | 8.3      |
| 2011MAL083  | SAMN13337404          | 34,118,415  | 97.31%         | 288                | 12.3     |

| sample     | NCBI accession number | # raw reads | % mapped reads | Medium insert size | coverage |
|------------|-----------------------|-------------|----------------|--------------------|----------|
| 2011MAL088 | SAMN13337405          | 29,032,425  | 97.65%         | 322                | 10.5     |
| 2011MIR019 | SAMN13337406          | 25,303,206  | 97.75%         | 386                | 9.2      |
| 2011MIR032 | SAMN13337407          | 28,069,375  | 97.56%         | 393                | 10.1     |
| 2011MIR033 | SAMN13337408          | 27,654,576  | 97.24%         | 374                | 10.0     |
| 2011MIR036 | SAMN13337409          | 91,169,806  | 96.13%         | 341                | 32.5     |
| 2011MIR056 | SAMN13337410          | 25,092,357  | 96.53%         | 382                | 9.0      |
| 2011MIR058 | SAMN13337411          | 25,570,335  | 96.78%         | 377                | 9.2      |
| 2011WAN033 | SAMN13337412          | 33,242,529  | 97.50%         | 297                | 12.0     |
| 2011WAN035 | SAMN13337413          | 28,550,801  | 97.23%         | 307                | 10.3     |
| 2011WAN041 | SAMN13337414          | 31,590,508  | 96.12%         | 342                | 11.2     |
| 2011WAN042 | SAMN13337415          | 83,751,592  | 96.81%         | 316                | 30.0     |
| 2011WAN043 | SAMN13337416          | 90,390,954  | 96.85%         | 316                | 32.4     |
| 2011WAN045 | SAMN13337417          | 27,397,435  | 96.55%         | 352                | 9.8      |
| 2011ASS097 | SAMN13337418          | 24,931,971  | 98.58%         | 373                | 9.1      |
| 2011ASS195 | SAMN13337419          | 25,499,747  | 97.06%         | 398                | 9.2      |
| 2011ASS213 | SAMN13337420          | 20,935,598  | 98.21%         | 393                | 7.6      |
| 2011MOY057 | SAMN13337421          | 51,606,695  | 92.20%         | 403                | 17.6     |
| 2011MOY063 | SAMN13337422          | 26,306,902  | 91.74%         | 410                | 8.9      |
| 2011MOY069 | SAMN13337423          | 24,675,282  | 88.39%         | 430                | 8.1      |
| 2011MOY072 | SAMN13337424          | 24,530,149  | 92.45%         | 396                | 8.4      |
| 2011MOY073 | SAMN13337425          | 36,126,723  | 75.67%         | 399                | 10.1     |
|            | <b>MEAN</b>           | 33,113,661  | 0.96%          | 385                | 11.7     |
|            | <b>MEDIAN</b>         | 26,061,794  | 0.97%          | 399                | 9.2      |
|            | <b>MIN</b>            | 17,095,249  | 0.76%          | 250                | 6.2      |
|            | <b>MAX</b>            | 91,730,833  | 0.99%          | 441                | 32.7     |

**Supplementary Table 2 –  $F_{ST}$  values for all inter-population comparisons.**

Standard deviation provided in parenthesis.

| Pop  | BANA                | DONE                | FARA                | FOUN                | KELA                | SAMA                | SEL                 | SENO               | FOUM               | ASS                 | BOE                | BOU                | MAL                | MIR                | MOY                | MUT                | OSS                | SAL                | WAN                | TNZK               | NCHE |
|------|---------------------|---------------------|---------------------|---------------------|---------------------|---------------------|---------------------|--------------------|--------------------|---------------------|--------------------|--------------------|--------------------|--------------------|--------------------|--------------------|--------------------|--------------------|--------------------|--------------------|------|
| BANA |                     |                     |                     |                     |                     |                     |                     |                    |                    |                     |                    |                    |                    |                    |                    |                    |                    |                    |                    |                    |      |
| DONE | -0.0030<br>(0.0002) |                     |                     |                     |                     |                     |                     |                    |                    |                     |                    |                    |                    |                    |                    |                    |                    |                    |                    |                    |      |
| FARA | 0.0094<br>(0.0003)  | -0.0016<br>(0.0002) |                     |                     |                     |                     |                     |                    |                    |                     |                    |                    |                    |                    |                    |                    |                    |                    |                    |                    |      |
| FOUN | -0.0041<br>(0.0002) | -0.0048<br>(0.0002) | 0.0055<br>(0.0003)  |                     |                     |                     |                     |                    |                    |                     |                    |                    |                    |                    |                    |                    |                    |                    |                    |                    |      |
| KELA | -0.0039<br>(0.0002) | -0.0026<br>(0.0002) | 0.0068<br>(0.0002)  | -0.0106<br>(0.0002) |                     |                     |                     |                    |                    |                     |                    |                    |                    |                    |                    |                    |                    |                    |                    |                    |      |
| SAMA | -0.0131<br>(0.0004) | -0.0210<br>(0.0003) | -0.0290<br>(0.0003) | -0.0186<br>(0.0003) | -0.0158<br>(0.0003) |                     |                     |                    |                    |                     |                    |                    |                    |                    |                    |                    |                    |                    |                    |                    |      |
| SEL  | -0.0044<br>(0.0002) | -0.0071<br>(0.0002) | -0.0008<br>(0.0002) | -0.0088<br>(0.0003) | -0.0080<br>(0.0002) | -0.0193<br>(0.0003) |                     |                    |                    |                     |                    |                    |                    |                    |                    |                    |                    |                    |                    |                    |      |
| SENO | -0.0019<br>(0.0002) | -0.0020<br>(0.0002) | 0.0059<br>(0.0002)  | -0.0077<br>(0.0002) | -0.0067<br>(0.0002) | -0.0159<br>(0.0003) | -0.0079<br>(0.0002) |                    |                    |                     |                    |                    |                    |                    |                    |                    |                    |                    |                    |                    |      |
| FOUM | 0.0180<br>(0.0003)  | 0.0293<br>(0.0005)  | 0.0422<br>(0.0007)  | 0.0310<br>(0.0006)  | 0.0321<br>(0.0006)  | 0.0231<br>(0.0008)  | 0.0229<br>(0.0005)  | 0.0309<br>(0.0005) |                    |                     |                    |                    |                    |                    |                    |                    |                    |                    |                    |                    |      |
| ASS  | 0.1785<br>(0.0011)  | 0.1932<br>(0.0011)  | 0.2035<br>(0.0011)  | 0.1849<br>(0.0011)  | 0.1959<br>(0.0012)  | 0.1766<br>(0.0011)  | 0.1871<br>(0.0011)  | 0.1995<br>(0.0011) | 0.1832<br>(0.0011) |                     |                    |                    |                    |                    |                    |                    |                    |                    |                    |                    |      |
| BOE  | 0.1539<br>(0.0008)  | 0.1610<br>(0.0008)  | 0.1671<br>(0.0008)  | 0.1581<br>(0.0009)  | 0.1654<br>(0.0009)  | 0.1405<br>(0.0008)  | 0.1541<br>(0.0008)  | 0.1636<br>(0.0008) | 0.1599<br>(0.0008) | 0.1982<br>(0.0016)  |                    |                    |                    |                    |                    |                    |                    |                    |                    |                    |      |
| BOU  | 0.1576<br>(0.0009)  | 0.1682<br>(0.0008)  | 0.1766<br>(0.0008)  | 0.1665<br>(0.0009)  | 0.1732<br>(0.0009)  | 0.1499<br>(0.0009)  | 0.1619<br>(0.0008)  | 0.1706<br>(0.0008) | 0.1594<br>(0.0009) | 0.1971<br>(0.0017)  | 0.0468<br>(0.0008) |                    |                    |                    |                    |                    |                    |                    |                    |                    |      |
| MAL  | 0.1455<br>(0.0008)  | 0.1575<br>(0.0008)  | 0.1677<br>(0.0009)  | 0.1561<br>(0.0008)  | 0.1626<br>(0.0009)  | 0.1416<br>(0.0009)  | 0.1514<br>(0.0008)  | 0.1606<br>(0.0008) | 0.1443<br>(0.0008) | 0.1817<br>(0.0016)  | 0.0427<br>(0.0008) | 0.0403<br>(0.0008) |                    |                    |                    |                    |                    |                    |                    |                    |      |
| MIR  | 0.1660<br>(0.0008)  | 0.1807<br>(0.0009)  | 0.1924<br>(0.0010)  | 0.1787<br>(0.0009)  | 0.1863<br>(0.0009)  | 0.1661<br>(0.0011)  | 0.1754<br>(0.0009)  | 0.1859<br>(0.0009) | 0.1629<br>(0.0008) | 0.1311<br>(0.0016)  | 0.1920<br>(0.0012) | 0.1885<br>(0.0013) | 0.1674<br>(0.0012) |                    |                    |                    |                    |                    |                    |                    |      |
| MOY  | 0.1812<br>(0.0010)  | 0.1963<br>(0.0010)  | 0.2075<br>(0.0010)  | 0.1905<br>(0.0010)  | 0.2005<br>(0.0011)  | 0.1807<br>(0.0011)  | 0.1905<br>(0.0010)  | 0.2023<br>(0.0010) | 0.1815<br>(0.0010) | -0.0066<br>(0.0011) | 0.1985<br>(0.0014) | 0.1946<br>(0.0015) | 0.1758<br>(0.0014) | 0.1280<br>(0.0014) |                    |                    |                    |                    |                    |                    |      |
| MUT  | 0.1521<br>(0.0009)  | 0.1639<br>(0.0008)  | 0.1738<br>(0.0009)  | 0.1626<br>(0.0009)  | 0.1692<br>(0.0009)  | 0.1473<br>(0.0010)  | 0.1582<br>(0.0008)  | 0.1670<br>(0.0008) | 0.1516<br>(0.0008) | 0.1869<br>(0.0017)  | 0.0295<br>(0.0007) | 0.0323<br>(0.0008) | 0.0134<br>(0.0007) | 0.1754<br>(0.0013) | 0.1835<br>(0.0015) |                    |                    |                    |                    |                    |      |
| OSS  | 0.1525<br>(0.0009)  | 0.1590<br>(0.0008)  | 0.1644<br>(0.0008)  | 0.1560<br>(0.0009)  | 0.1631<br>(0.0009)  | 0.1375<br>(0.0008)  | 0.1519<br>(0.0008)  | 0.1613<br>(0.0008) | 0.1596<br>(0.0008) | 0.1962<br>(0.0016)  | 0.0362<br>(0.0008) | 0.0460<br>(0.0008) | 0.0438<br>(0.0007) | 0.1927<br>(0.0012) | 0.1971<br>(0.0014) | 0.0414<br>(0.0007) |                    |                    |                    |                    |      |
| SAL  | 0.1628<br>(0.0009)  | 0.1717<br>(0.0009)  | 0.1788<br>(0.0008)  | 0.1694<br>(0.0009)  | 0.1763<br>(0.0010)  | 0.1516<br>(0.0009)  | 0.1651<br>(0.0009)  | 0.1746<br>(0.0009) | 0.1666<br>(0.0009) | 0.2054<br>(0.0018)  | 0.0649<br>(0.0011) | 0.0567<br>(0.0011) | 0.0367<br>(0.0009) | 0.1952<br>(0.0013) | 0.2030<br>(0.0016) | 0.0452<br>(0.0010) | 0.0524<br>(0.0010) |                    |                    |                    |      |
| WAN  | 0.1568<br>(0.0008)  | 0.1707<br>(0.0009)  | 0.1825<br>(0.0010)  | 0.1681<br>(0.0009)  | 0.1758<br>(0.0009)  | 0.1564<br>(0.0010)  | 0.1651<br>(0.0009)  | 0.1752<br>(0.0009) | 0.1550<br>(0.0008) | 0.1203<br>(0.0016)  | 0.1809<br>(0.0012) | 0.1767<br>(0.0013) | 0.1564<br>(0.0012) | 0.0022<br>(0.0006) | 0.1162<br>(0.0014) | 0.1653<br>(0.0013) | 0.1807<br>(0.0012) | 0.1837<br>(0.0013) |                    |                    |      |
| TNZK | 0.0917<br>(0.0006)  | 0.0966<br>(0.0006)  | 0.1022<br>(0.0005)  | 0.0932<br>(0.0006)  | 0.0990<br>(0.0006)  | 0.0769<br>(0.0006)  | 0.0890<br>(0.0005)  | 0.0983<br>(0.0006) | 0.1016<br>(0.0006) | 0.1818<br>(0.0013)  | 0.1364<br>(0.0009) | 0.1433<br>(0.0009) | 0.1304<br>(0.0009) | 0.1648<br>(0.0009) | 0.1826<br>(0.0012) | 0.1371<br>(0.0009) | 0.1347<br>(0.0009) | 0.1493<br>(0.0012) | 0.1533<br>(0.0009) |                    |      |
| NCHE | 0.0422<br>(0.0005)  | 0.0499<br>(0.0004)  | 0.0604<br>(0.0005)  | 0.0478<br>(0.0005)  | 0.0524<br>(0.0005)  | 0.0365<br>(0.0006)  | 0.0427<br>(0.0004)  | 0.0514<br>(0.0005) | 0.0446<br>(0.0004) | 0.1541<br>(0.0012)  | 0.1223<br>(0.0008) | 0.1247<br>(0.0009) | 0.1105<br>(0.0008) | 0.1363<br>(0.0008) | 0.1534<br>(0.0011) | 0.1174<br>(0.0008) | 0.1211<br>(0.0008) | 0.1311<br>(0.0010) | 0.1259<br>(0.0008) | 0.0583<br>(0.0006) |      |

**Supplementary Table 3 – Information population sampling**

| <b>Country</b> | <b>Site</b>     | <b>Abbreviation</b> | <b>Latitude</b> | <b>Longitude</b> | <b>Year</b> | <b>N</b> |
|----------------|-----------------|---------------------|-----------------|------------------|-------------|----------|
| Mali           | Banambani       | BANA                | 12.8            | -8.05            | 2006        | 6        |
| Mali           | Doneguebougou   | DONE                | 12.80683        | -7.98476         | 2006        | 6        |
| Mali           | Farada          | FARA                | 12.43664        | -8.20617         | 2006        | 5        |
| Mali           | Founia          | FOUN                | 12.89163        | -9.46063         | 2006        | 4        |
| Mali           | Kela            | KELA                | 11.88683        | -8.44744         | 2006        | 5        |
| Mali           | Ngabokoro Droit | NGAB                | 12.6935         | -7.8499          | 2006        | 1        |
| Mali           | Samakorola      | SAMA                | 13.9167         | -8.0833          | 2006        | 2        |
| Mali           | Selinkenye      | SELI                | 11.7            | -8.2833          | 2006        | 5        |
| Mali           | Senou           | SENO                | 12.5167         | -7.9167          | 2006        | 6        |
| Cameroon       | Foumbot         | FOUM                | 5.4851          | 10.6             | 2006        | 5        |
| Tanzania       | Dar Es Salaam   | 6                   | -6.8333         | 39.2667          | 2012        | 6        |
| Zambia         | Nchelenge       | NCHE                | -9.3333         | 28.7167          | 2015        | 6        |
| Comoros        | Assimpao        | ASS                 | -12.2373        | 44.3165          | 2011        | 3        |
| Comoros        | Boeninidi       | BOE                 | -11.5659        | 43.2872          | 2011        | 6        |
| Comoros        | Bouni           | BOU                 | -11.4894        | 43.3975          | 2011        | 6        |
| Comoros        | Malé            | MAL                 | -11.8865        | 43.5063          | 2011        | 6        |
| Comoros        | Miringoni       | MIR                 | -12.302         | 43.6372          | 2011        | 6        |
| Comoros        | Moya            | MOY                 | -12.3093        | 44.4395          | 2011        | 5        |
| Comoros        | Mutsamudu       | MUT                 | -11.6099        | 43.3903          | 2011        | 6        |
| Comoros        | Ossivo          | OSS                 | -11.5884        | 43.2776          | 2011        | 6        |
| Comoros        | Saliman         | SAL                 | -11.6803        | 43.2661          | 2011        | 4        |
| Comoros        | Wanani          | WAN                 | -12.3451        | 43.8001          | 2011        | 6        |
