# Supplementary material for: Transcontinental dispersal of Anopheles gambiae occurred from West African origin via serial founder events
Source: PubMed Central journal article supplement (PMC6923408; doi:10.1038/s42003-019-0717-7), 2019-12-19
Supplement: 42003_2019_717_MOESM2_ESM.pdf [file 42003_2019_717_MOESM2_ESM.pdf]

## Reporting Summary

Nature Research wishes to improve the reproducibility of the work that we publish. This form provides structure for consistency and transparency in reporting. For further information on Nature Research policies, see [Authors & Referees](#) and the [Editorial Policy Checklist](#).

### Statistics

For all statistical analyses, confirm that the following items are present in the figure legend, table legend, main text, or Methods section.

n/a Confirmed

- The exact sample size ( $n$ ) for each experimental group/condition, given as a discrete number and unit of measurement
- A statement on whether measurements were taken from distinct samples or whether the same sample was measured repeatedly
- The statistical test(s) used AND whether they are one- or two-sided  
*Only common tests should be described solely by name; describe more complex techniques in the Methods section.*
- A description of all covariates tested
- A description of any assumptions or corrections, such as tests of normality and adjustment for multiple comparisons
- A full description of the statistical parameters including central tendency (e.g. means) or other basic estimates (e.g. regression coefficient) AND variation (e.g. standard deviation) or associated estimates of uncertainty (e.g. confidence intervals)
- For null hypothesis testing, the test statistic (e.g.  $F$ ,  $t$ ,  $r$ ) with confidence intervals, effect sizes, degrees of freedom and  $P$  value noted  
*Give  $P$  values as exact values whenever suitable.*
- For Bayesian analysis, information on the choice of priors and Markov chain Monte Carlo settings
- For hierarchical and complex designs, identification of the appropriate level for tests and full reporting of outcomes
- Estimates of effect sizes (e.g. Cohen's  $d$ , Pearson's  $r$ ), indicating how they were calculated

*Our web collection on [statistics for biologists](#) contains articles on many of the points above.*

### Software and code

Policy information about [availability of computer code](#)

Data collection

Data analysis

For manuscripts utilizing custom algorithms or software that are central to the research but not yet described in published literature, software must be made available to editors/reviewers. We strongly encourage code deposition in a community repository (e.g. GitHub). See the Nature Research [guidelines for submitting code & software](#) for further information.

### Data

Policy information about [availability of data](#)

All manuscripts must include a [data availability statement](#). This statement should provide the following information, where applicable:

- Accession codes, unique identifiers, or web links for publicly available datasets
- A list of figures that have associated raw data
- A description of any restrictions on data availability

### Field-specific reporting

Please select the one below that is the best fit for your research. If you are not sure, read the appropriate sections before making your selection.

- Life sciences  Behavioural & social sciences  Ecological, evolutionary & environmental sciences

## Ecological, evolutionary & environmental sciences study design

All studies must disclose on these points even when the disclosure is negative.

|                                   |                                                                                                                                                                                                                                                                                                                                                                        |
|-----------------------------------|------------------------------------------------------------------------------------------------------------------------------------------------------------------------------------------------------------------------------------------------------------------------------------------------------------------------------------------------------------------------|
| Study description                 | This study is the first whole genome population genetic analyses of <i>A. gambiae</i> across Africa that includes remote island populations with the goal of generating a more inclusive view of the species' evolutionary history.                                                                                                                                    |
| Research sample                   | We used N=111 <i>Anopheles gambiae</i> specimens (N=40 from Mali, N=5 from Cameroon, N=6 from Tanzania, N=6 from Zambia, and N=54 from the Comoros) from the Vector Genetics Laboratory archive mosquito DNA collection for the study.                                                                                                                                 |
| Sampling strategy                 | Samples from Mali and Cameroon were collected as female adults inside houses using mouth aspirators in August 2006. Samples from the Comoros were collected as larvae inside cisterns using scoops and transfer pipets in February 2011. Tanzania samples were collected 2012 and Zambia samples in April and May 2015 as adults by pyrethroid spray catch collection. |
| Data collection                   | Samples from Mali and Cameroon were collected as female adults inside houses using mouth aspirators in August 2006. Samples from the Comoros were collected as larvae inside cisterns using scoops and transfer pipets in February 2011. Tanzania samples were collected 2012 and Zambia samples in April and May 2015 as adults by pyrethroid spray catch collection. |
| Timing and spatial scale          | Samples from Mali and Cameroon were collected as female adults inside houses using mouth aspirators in August 2006. Samples from the Comoros were collected as larvae inside cisterns using scoops and transfer pipets in February 2011. Tanzania samples were collected 2012 and Zambia samples in April and May 2015 as adults by pyrethroid spray catch collection. |
| Data exclusions                   | We excluded samples that appeared to be from other mosquito species based on the DIS report.                                                                                                                                                                                                                                                                           |
| Reproducibility                   | No unusual attempts.                                                                                                                                                                                                                                                                                                                                                   |
| Randomization                     | No randomization was done, because the affiliation with the geographical groups was the essence of the study.                                                                                                                                                                                                                                                          |
| Blinding                          | No blinding was done.                                                                                                                                                                                                                                                                                                                                                  |
| Did the study involve field work? | <input type="checkbox"/> Yes <input checked="" type="checkbox"/> No                                                                                                                                                                                                                                                                                                    |

## Reporting for specific materials, systems and methods

We require information from authors about some types of materials, experimental systems and methods used in many studies. Here, indicate whether each material, system or method listed is relevant to your study. If you are not sure if a list item applies to your research, read the appropriate section before selecting a response.

### Materials & experimental systems

| n/a                                 | Involvement                                                     |
|-------------------------------------|-----------------------------------------------------------------|
| <input checked="" type="checkbox"/> | <input type="checkbox"/> Antibodies                             |
| <input checked="" type="checkbox"/> | <input type="checkbox"/> Eukaryotic cell lines                  |
| <input checked="" type="checkbox"/> | <input type="checkbox"/> Palaeontology                          |
| <input type="checkbox"/>            | <input checked="" type="checkbox"/> Animals and other organisms |
| <input checked="" type="checkbox"/> | <input type="checkbox"/> Human research participants            |
| <input checked="" type="checkbox"/> | <input type="checkbox"/> Clinical data                          |

### Methods

| n/a                                 | Involvement                                     |
|-------------------------------------|-------------------------------------------------|
| <input checked="" type="checkbox"/> | <input type="checkbox"/> ChIP-seq               |
| <input checked="" type="checkbox"/> | <input type="checkbox"/> Flow cytometry         |
| <input checked="" type="checkbox"/> | <input type="checkbox"/> MRI-based neuroimaging |

## Animals and other organisms

Policy information about [studies involving animals](#); [ARRIVE guidelines](#) recommended for reporting animal research

|                         |                                                                |
|-------------------------|----------------------------------------------------------------|
| Laboratory animals      | Only mosquitoes from the species <i>An. gambiae</i> were used. |
| Wild animals            | No animals were brought into captivity.                        |
| Field-collected samples | Mosquitoes collected in the field were sacrificed on site.     |
| Ethics oversight        | No ethical approval was required.                              |

Note that full information on the approval of the study protocol must also be provided in the manuscript.
